# Supplementary material for: Neuropilin-2 induced by transforming growth factor-β augments migration of hepatocellular carcinoma cells
Source: PubMed Central journal article supplement (PMC4647494; doi:10.1186/s12885-015-1919-0), 2015-11-16

# Supplementary Figure 1; Wittman et al.

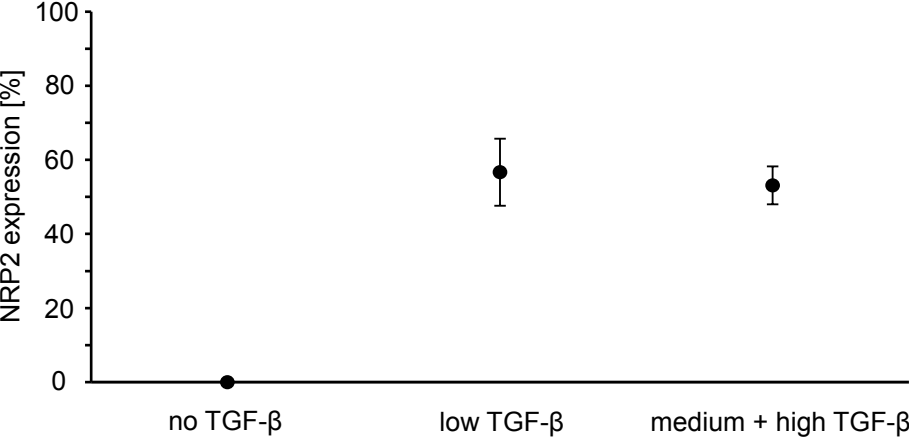

Supplement: 12885_2015_1919_MOESM1_ESM.pdf [file 12885_2015_1919_MOESM1_ESM.pdf]
